# Supplementary material for: Creating custom synthetic genomes in Escherichia coli with REXER and GENESIS
Source: Springer Nature journal article supplement (doi:10.1038/s41596-020-00464-3), 2021-04-26
Supplement: MOESM3 [file 41596_2020_464_MOESM3_ESM18.xlsx]

## Sheet: Sheet1
Supplementary Table 1
Primer Name	Sequence (5' to 3')	Meaning of 'N's	Comments/considerations
rK-RX2_F	(N)50-80GGCCTGGTGATGATGGCGGGATCGTTGTATATTTCTTG	Homology arm to 5' of locus 0 (HR1)
rK-RX4_F	(N)50-80CTAAGGCCTGGTGATGATGGCGGGATCGTTGTATATTTCTTG	Homology arm to 5' of locus 0 (HR1)
rK_R	(N)50-80TCAGAAGAACTCGTCAAGAAGGCGAT	Homology arm to 3' of locus 0
loc0geno_F	Design by user		Binding 200-300 bp upstream of locus0
loc0geno_R	Design by user		Binding 200-300 bp downstream of locus0
loc1geno_F	Design by user		Binding 200-300 bp upstream of locus1
loc1geno_R	Design by user		Binding 200-300 bp downstream of locus1
loc2geno_F	Design by user		Only necessary for GENESIS (2nd REXER step). Binding 200-300 bp upstream of locus2
loc2geno_R	Design by user		Only necessary for GENESIS (2nd REXER step). Binding 200-300 bp downstream of locus2
j1_F	GGACAAAATACCTGGTTACCCAGG
j1_R	Design by user		Binding 200-300 bp downstream of the 5' end of the first synthetic stretch
jn_F	Design by user		Binding 200-300 from the terminus of a synthetic stretch
jn_R	Design by user		Binding 200-300 from the terminus of a synthetic stretch
j2_F	Design by user		Binding 200-300 bp upstream of the 3' end of the last synthetic stretch
j2_R	GTAGCCGTGATAGTTTGCGACAG
j3_F	Design by user		Only necessary for GENESIS (2nd REXER step). Binding 200-300 bp upstream of the 3' end of the last synthetic stretch
j3_R	ATACACGAGTACATACGCCACG		Only necessary for GENESIS (2nd REXER step)
BAC_F	AACCTATAAAAATAGGCGTATCACGAGGC
BAC_R	(N)50-80CCTAGGGCCTGTCGACAGCGACACACTTGCATC	Homology arm to 5' of first synthetic stretch (HR1)
BAC2_R	(N)50-80CCTAGGGCCTGTCGACAGCGACACACTTGCATC	Homology arm to 5' of first synthetic stretch (HR3)	Only necessary for GENESIS (2nd REXER step)
sC_scF	(N)50-80ACTAGGAGCACGTGTTGACAATTAATCATCGGCATAGTATATC	Homology to the 3' terminal sequence of the last synthetic stretch	Only necessary for GENESIS (2nd REXER step)
sC_scR	TGAGGGTAAGCTTCCTAGG(N)50-80TTACGCCCCGCCCTGCCACTCATCGCAGTACTGTTGTA	Homology arm to 3' of locus1 (HR2)	Only necessary for GENESIS (2nd REXER step)
rK_scF	(N)50-80CTAAGGCCTGGTGATGATGGCGGGATCGTT	Homology to the 3' terminal sequence of the last synthetic stretch	Only necessary for GENESIS (2nd REXER step)
rK_scR	GTCAACACGTGCTCAAGCTTCCTAGG(N)50-80TCAGAAGAACTCGTCAAGAAGGCGATAG	Homology arm to 3' of locus3 (HR4)	Only necessary for GENESIS (2nd REXER step)
bb1_scF	CCTAGGAAGCTTACCCTCACTAAAGGG
bb1_scR	(N)20GAGACCGCGCAACGCAATTAATGTAAG	Homology to the 5' of sC_scF for Gibson assembly
bb2_scF	AGCTTGAGCACGTGTTGACAATTAATCATCG		Only necessary for GENESIS (2nd REXER step)
bb2_scR	(N)20GAGACCGCGCAACGCAATTAATGTAAG	Homology to the 5' of rK_scF for Gibson assembly	Only necessary for GENESIS (2nd REXER step)
sc_seq_F	CAAGGCGACAAGGTGCTGATG
sc_seq_R	GTAGCCGTGATAGTTTGCGACAG
sc_seq1_F	GAATGGGCTGACCGCTTCCTCGTGCTTTACGG		Only necessary for GENESIS (2nd REXER step)
sc_seq1_R	CGTGCAATCCATCTTGTTCAATCATG		Only necessary for GENESIS (2nd REXER step)
RX2_peF	(N1)30GTTTTAGAGCTATGCTGTTTTGAATGGTCCCAAAAC(N2)30	N1 - bSpacer1 ; N2 - bSpacer 2 (see Box 1)	The sequences for gSPacer1/2 and bSpacer1/2 change with each REXER step (see Box 1 and Supplementary Fig 1).
RX2_peR	CAGCAGGACGCACTGACCGAATTCAACTCAACAAGTCTCAGTGTGCTGAAGTTTTGGGACCATTCAAAACAGCATAGCTCTAAAAC(N)30	Reverse complement of N2 in RX2_peF
RX4_peF	(N1)30GTTTTAGAGCTATGCTGTTTTGAATGGTCCCAAAAC(N2)30	N1 - bSpacer2 ; N2 - gSpacer1 (see Box 1)
RX4_peR	(N1)30GTTTTGGGACCATTCAAAACAGCATAGCTCTAAAAC(N2)30	N1 - Reverse complement of gSpacer 1 (see Box 1) ; N2 - Reverse complement of N2 in RX4_peF
RX2_F	GACAAATAGTGCGATTACGAAATTTTTTAGACAAAAATAGTCTACGAGGTTTTAGAGCTATGCTGTTTTGAATGGTCCCAAAAC(N)30	bSpacer1 (see Box 1)
RX2_R	Same as RX2_peR
RX4_F	GACAAATAGTGCGATTACGAAATTTTTTAGACAAAAATAGTCTACGAGGTTTTAGAGCTATGCTGTTTTGAATGGTCCCAAAAC(N1)30GTTTTAGAGCTATGCTGTTTTGAATGGTCCCAAAAC(N2)30	N1 - bSpacer1 ; N2 - bSpacer2 (see Box 1)
RX4_R	GATACTGAGCACATCAGCAGGACGCACTGACCGAATTCAACTCAACAAGTCTCAGTGTGCTGAAGTTTTGGGACCATTCAAAACAGCATAGCTCTAAAAC(N)30	Reverse complement of gSpacer2 (see Box 1)
ls_F	GTTTTATTTGATGCCTCTAGCACGCGTACCATG	Linear spacer amplification Forward (see Box 1)
ls_R	GATACTGAGCACATCAGCAGGACGCAC	Linear spacer amplification Reverse (see Box 1)
